# Supplementary material for: High-Sensitivity Cardiac Troponin Concentration and Risk of First-Ever Cardiovascular Outcomes in 154,052 Participants
Source: PubMed Central journal article supplement (PMC5527070; doi:10.1016/j.jacc.2017.05.062), 2017-08-01
Supplement: mmc1.pdf [file mmc1.pdf]

**High-sensitivity cardiac troponin concentration and risk of first-ever cardiovascular outcomes: Literature-based meta-analysis involving 154,052 participants**

Supplemental Material

## SUPPLEMENTAL METHODS

---

### THE PROSPER STUDY.

The Prospective Study of Pravastatin in the Elderly at Risk (PROSPER) is a randomized, double-blind, placebo-controlled trial designed to investigate the effect of pravastatin in prevention of vascular events in older individuals with pre-existing cardiovascular disease or risk factors thereof (1,2). Between 15 December 1997 and 7 May 1999, a total of 5,804 individuals were screened at the study centres in Scotland, Ireland and the Netherlands. To be included participants were required to have: (i) either pre-existing vascular disease (coronary, cerebral, or peripheral) or raised risk of such disease because of smoking, hypertension or diabetes; (ii) a plasma total cholesterol level of 4.0–9.0 mmol/L; and (iii) a triglyceride concentration of  $\leq 6.0$  mmol/L. The list of exclusion criteria of PROSPER are provided in the design paper (2) and included: (i) poor cognitive function (Mini-Mental State Examination score  $< 24$  points); (ii) congestive heart failure (defined as New York Heart Association functional class III or IV); (iii) a diagnosis of atrial fibrillation, or (iv) abnormal laboratory findings such as serum creatinine of  $> 200$   $\mu\text{mol/L}$ . For the purpose of the present investigation, we excluded participants with a history of myocardial infarction or stroke ( $n=980$ ), missing information on hs-cTnT concentration ( $n=25$ ) or on covariates ( $n=397$ ), leaving 4,402 participants in the analysis (Online Figure 1). hs-cTnT concentration was measured in plasma samples obtained six months after randomisation using a high-sensitivity electrochemiluminescence immunoassay on a Roche Modular Analytics E170 platform. The occurrence of incident outcomes was adjudicated by the PROSPER Endpoints Committee during the in-trial phase (mean duration: 3.2 years) and ascertained with routine health data thereafter. The combined CVD endpoint was composed of fatal coronary heart disease (CHD), non-fatal myocardial infarction, and fatal plus non-fatal stroke (ischemic, hemorrhagic or

unclassified). When re-infarction or death occurs following a non-fatal myocardial infarction within the same period of hospitalization (up to and including 14 days from the date of admission), the subsequent event were regarded as the same event unless electrocardiographic and/or post-mortem evidence suggests an infarction in a different site. When death occurred following a non-fatal stroke within a period of 28 days from the event, it was regarded as due to a fatal stroke in the absence of other clinical events. Information on fatal outcomes was available in the overall cohort, whereas additional information on non-fatal outcomes was available for the Scottish trial centre (n=1,889). The institutional ethics review boards of all centres approved the protocol and all participants gave written informed consent. The protocol adhered to the principles of the Declaration of Helsinki.

## **REFERENCES**

1. Shepherd J, Blauw GJ, Murphy MB, et al. Pravastatin in elderly individuals at risk of vascular disease (PROSPER): a randomised controlled trial. *Lancet* 2002;360:1623–30.
2. Shepherd J, Blauw GJ, Murphy MB, et al. The design of a prospective study of Pravastatin in the Elderly at Risk (PROSPER). PROSPER Study Group. PROspective Study of Pravastatin in the Elderly at Risk. *Am J Cardiol* 1999;84:1192–7.

## SUPPLEMENTAL TABLES

### Online Table 1 Search strategy for the systematic review of the published literature

|                                                                                                                                                                                                                                                                                                                                                                                                                                                                                                                                                                                                                                                                                                                                                                                                                                                                                                                                                                                     |
|-------------------------------------------------------------------------------------------------------------------------------------------------------------------------------------------------------------------------------------------------------------------------------------------------------------------------------------------------------------------------------------------------------------------------------------------------------------------------------------------------------------------------------------------------------------------------------------------------------------------------------------------------------------------------------------------------------------------------------------------------------------------------------------------------------------------------------------------------------------------------------------------------------------------------------------------------------------------------------------|
| <b>PubMed</b><br>(((("high-sensitive" OR "high sensitivity" OR "highly-sensitive" OR "highly sensitivity" OR "sensitive assay") AND troponin OR "sensitive Troponin") AND ("Cardiovascular Diseases"[Mesh] OR "Cardiovascular Disease" OR "Cardiovascular Death" OR "Vascular Disease" OR "Vascular Death" OR "Ischemic Heart Disease" OR "Myocardial ischaemia" OR "Myocardial ischemia" OR "Acute coronary syndrome" OR "Coronary disease" OR "Coronary heart disease" OR "Coronary artery disease" OR "Myocardial infarction" OR "Heart attack" OR "Cerebrovascular disease" OR "Stroke" OR "Apoplexy" OR "Brain vascular accident" OR "Cerebrovascular accident" ) AND ((cohort studies[MeSH]) OR (epidemiologic studies[MeSH]) OR (prospective studies[MeSH]) OR (epidemiologic stud*) OR (cohort stud*) OR (population stud*) OR (prospective stud*) OR (observational stud*) OR (longitudinal stud*) OR (odds OR risk OR hazard)) ) NOT ("Animals"[Mesh] NOT "Humans"[Mesh]) |
| <b>Web of Science</b><br>TS= (("high-sensitive" OR "high sensitivity" OR "highly-sensitive" OR "highly sensitivity" OR "sensitive assay") AND troponin OR "sensitive Troponin") AND TS= ("Cardiovascular Disease" OR "Cardiovascular Death" OR "Vascular Disease" OR "Vascular Death" OR "Ischemic Heart Disease" OR "Myocardial ischaemia" OR "Myocardial ischemia" OR "Acute coronary syndrome" OR "Coronary disease" OR "Coronary heart disease" OR "Coronary artery disease" OR "Myocardial infarction" OR "Heart attack" OR "Cerebrovascular disease" OR "Stroke" OR "Apoplexy" OR "Brain vascular accident" OR "Cerebrovascular accident" ) AND TS= ((epidemiologic stud*) OR (cohort stud*) OR (population stud*) OR (prospective stud*) OR (observational stud*) OR (longitudinal stud*) OR (odds OR risk OR hazard))                                                                                                                                                       |
| <b>EMBASE</b><br>(("high-sensitive" OR "high sensitivity" OR "highly-sensitive" OR "highly sensitivity" OR "sensitive assay") AND troponin OR "sensitive Troponin").af AND ("Cardiovascular Disease" OR "Cardiovascular Death" OR "Vascular Disease" OR "Vascular Death" OR "Ischemic Heart Disease" OR "Myocardial ischaemia" OR "Myocardial ischemia" OR "Acute coronary syndrome" OR "Coronary disease" OR "Coronary heart disease" OR "Coronary artery disease" OR "Myocardial infarction" OR "Heart attack" OR "Cerebrovascular disease" OR "Stroke" OR "Apoplexy" OR "Brain vascular accident" OR "Cerebrovascular accident" ).af AND ((epidemiologic stud*) OR (cohort stud*) OR (population stud*) OR (prospective stud*) OR (observational stud*) OR (longitudinal stud*) OR (odds OR risk OR hazard)).af                                                                                                                                                                  |

**Online Table 2** Baseline characteristics of PROSPER participants

| Baseline characteristic             | Mean (SD), median [IQR] or n (%) |                                |                                 |                             | P value* |
|-------------------------------------|----------------------------------|--------------------------------|---------------------------------|-----------------------------|----------|
|                                     | Overall                          | Bottom hs-cTnT third (<5 ng/L) | Middle hs-cTnT third (5-8 ng/L) | Top hs-cTnT third (>8 ng/L) |          |
| No. of participants                 | 4,402                            | 1,375                          | 1,345                           | 1,682                       |          |
| Questionnaire-based                 |                                  |                                |                                 |                             |          |
| Age, years                          | 75 (3)                           | 74 (3)                         | 75 (3)                          | 76 (3)                      | <0.001   |
| Male sex, n (%)                     | 1973 (45%)                       | 374 (27%)                      | 610 (45%)                       | 989 (59%)                   | <0.001   |
| Current smoker, n (%)               | 1237 (28%)                       | 413 (30%)                      | 383 (28%)                       | 441 (26%)                   | 0.004    |
| Intervention group, n (%)           | 2187 (50%)                       | 675 (49%)                      | 666 (50%)                       | 846 (50%)                   | 1.000    |
| Physical measurements               |                                  |                                |                                 |                             |          |
| Body mass index, kg/m <sup>2</sup>  | 26.8 (4.2)                       | 26.3 (4.0)                     | 27.0 (4.3)                      | 27.2 (4.3)                  | <0.001   |
| Systolic blood pressure, mmHg       | 155 (21)                         | 151 (21)                       | 155 (21)                        | 159 (22)                    | <0.001   |
| Diastolic blood pressure, mmHg      | 84 (11)                          | 83 (11)                        | 84 (11)                         | 85 (11)                     | <0.001   |
| Blood-based biomarkers              |                                  |                                |                                 |                             |          |
| NT-proBNP at 6 months, pg/mL        | 136 [75, 261]                    | 100 [59, 171]                  | 127 [75, 235]                   | 195 [100, 413]              | <0.001   |
| Total cholesterol, mmol/L           | 5.7 (0.9)                        | 5.9 (0.9)                      | 5.7 (0.9)                       | 5.6 (0.9)                   | 0.102    |
| HDL cholesterol, mmol/L             | 1.3 (0.4)                        | 1.3 (0.3)                      | 1.3 (0.4)                       | 1.3 (0.4)                   | 0.330    |
| eGFR, mL/min/1.73m <sup>2</sup>     | 58 (14)                          | 59 (13)                        | 58 (14)                         | 56 (14)                     | <0.001   |
| C-reactive protein, mg/L            | 3.1 [1.5, 6.0]                   | 2.7 [1.4, 5.5]                 | 3.2 [1.6, 6.2]                  | 3.3 [1.7, 6.6]              | <0.001   |
| Baseline disease history            |                                  |                                |                                 |                             |          |
| History of diabetes mellitus, n (%) | 467 (11%)                        | 110 (8%)                       | 147 (11%)                       | 210 (12%)                   | 0.019    |
| History of hypertension, n (%)      | 2874 (65%)                       | 856 (62%)                      | 873 (65%)                       | 1145 (68%)                  | <0.001   |

\*P values for differences across hs-cTnT thirds were estimated using linear or logistic regression models, as appropriate, adjusted for age, sex, centre, and intervention arm. Abbreviations: eGFR=estimated glomerular filtration rate, HDL=high-density lipoprotein, NT-proBNP=N-terminal pro B-type natriuretic peptide.

**Online Table 3** Progressive adjustment the associations of hs-cTnT concentration with cardiovascular outcomes in PROSPER

| Outcome               | Thirds of hs-cTnT concentration (ng/L) |                            |                        |
|-----------------------|----------------------------------------|----------------------------|------------------------|
|                       | Bottom third<br>(<5 ng/L)              | Middle third<br>(5-8 ng/L) | Top third<br>(>8 ng/L) |
| <b>CVD</b>            |                                        |                            |                        |
| No. of events         | 141                                    | 162                        | 216                    |
| Hazard ratio (95% CI) |                                        |                            |                        |
| Model 1               | 1 [Reference]                          | 1.32 (1.05, 1.66)          | 1.60 (1.27, 2.02)      |
| Model 2               | 1 [Reference]                          | 1.31 (1.04, 1.65)          | 1.55 (1.23, 1.96)      |
| Model 3               | 1 [Reference]                          | 1.24 (0.98, 1.57)          | 1.32 (1.03, 1.68)      |
| <b>CVD death</b>      |                                        |                            |                        |
| No. of events         | 132                                    | 192                        | 370                    |
| Hazard ratio (95% CI) |                                        |                            |                        |
| Model 1               | 1 [Reference]                          | 1.42 (1.14, 1.78)          | 2.14 (1.74, 2.65)      |
| Model 2               | 1 [Reference]                          | 1.43 (1.14, 1.79)          | 2.16 (1.74, 2.67)      |
| Model 3               | 1 [Reference]                          | 1.38 (1.10, 1.73)          | 1.83 (1.47, 2.28)      |
| <b>CHD</b>            |                                        |                            |                        |
| No. of events         | 105                                    | 121                        | 179                    |
| Hazard ratio (95% CI) |                                        |                            |                        |
| Model 1               | 1 [Reference]                          | 1.30 (1.00, 1.70)          | 1.79 (1.38, 2.33)      |
| Model 2               | 1 [Reference]                          | 1.32 (1.01, 1.72)          | 1.85 (1.42, 2.42)      |
| Model 3               | 1 [Reference]                          | 1.25 (0.96, 1.64)          | 1.60 (1.21, 2.11)      |
| <b>Stroke</b>         |                                        |                            |                        |
| No. of events         | 84                                     | 83                         | 102                    |
| Hazard ratio (95% CI) |                                        |                            |                        |
| Model 1               | 1 [Reference]                          | 1.17 (0.85, 1.59)          | 1.29 (0.94, 1.77)      |
| Model 2               | 1 [Reference]                          | 1.14 (0.84, 1.56)          | 1.21 (0.88, 1.67)      |
| Model 3               | 1 [Reference]                          | 1.12 (0.82, 1.54)          | 1.11 (0.80, 1.56)      |

Model 1 was adjusted for age, sex, and centre, and stratified by treatment arm. Model 2 was further adjusted for smoking status, history of diabetes mellitus, history of hypertension, systolic blood pressure, total cholesterol, high-density lipoprotein cholesterol, and body mass index. Model 3 was further adjusted for C-reactive protein, estimated glomerular filtration rate, and N-terminal pro B-type natriuretic peptide.

**Online Table 4 Improvements in CVD prediction by addition of information on hs-cTnT concentration to a model containing conventional risk factors in PROSPER\***

| Risk prediction metric             | CVD                     |         | Fatal CVD             |         |
|------------------------------------|-------------------------|---------|-----------------------|---------|
|                                    | Estimate (95% CI)       | P value | Estimate (95% CI)     | P value |
| <b>C-index</b>                     |                         |         |                       |         |
| Conventional risk factors          | 0.593 (0.574, 0.622)    | -       | 0.600 (0.583, 0.616)  | -       |
| Addition of hs-cTnT                | 0.602 (0.584, 0.622)    | -       | 0.628 (0.613, 0.643)  | -       |
| Difference in C-index              | 0.009 (-0.017, 0.037)   | 0.51    | 0.028 (0.007, 0.050)  | 0.018   |
| <b>Categorical NRI<sup>†</sup></b> |                         |         |                       |         |
| Cases                              | -0.039 (-0.072, -0.005) | 0.012   | 0.108 (0.063, 0.153)  | <0.001  |
| Non-Cases                          | 0.063 (0.039, 0.087)    | <0.001  | 0.015 (-0.004, 0.034) | 0.059   |
| Overall                            | 0.024 (-0.017, 0.066)   | 0.25    | 0.123 (0.074, 0.153)  | <0.001  |
| <b>Continuous NRI</b>              |                         |         |                       |         |
| Cases                              | 0.044 (-0.042, 0.130)   | 0.31    | 0.210 (0.138, 0.283)  | <0.001  |
| Non-Cases                          | 0.108 (0.055, 0.161)    | <0.001  | 0.146 (0.114, 0.178)  | <0.001  |
| Overall                            | 0.152 (0.052, 0.253)    | 0.003   | 0.357 (0.277, 0.436)  | <0.001  |

\*The conventional risk factors model included information on age, sex, centre, smoking status, history of diabetes mellitus, systolic blood pressure, and levels of total cholesterol and high-density lipoprotein cholesterol, and was stratified by treatment arm. Information on hs-cTnT was entered in categories as specified in [Figure 1](#). <sup>†</sup>Net reclassification across 10-year risk categories <15%, 15%-<25%, and ≥25%.

**Online Table 5** Reclassification of PROSPER participants across categories of predicted 10-year risk of CVD and fatal CVD with addition of information on hs-cTnT to a model containing conventional risk factors

**(a) CVD**

| Conventional risk factors model | Addition of information on hs-cTnT |                 |                 |                      |                  |                 |
|---------------------------------|------------------------------------|-----------------|-----------------|----------------------|------------------|-----------------|
|                                 | No. of cases (%)                   |                 |                 | No. of non-cases (%) |                  |                 |
|                                 | <15%                               | 15-<25%         | ≥25%            | <15%                 | 15-<25%          | ≥25%            |
| <15%                            | 9 (1.7)                            | <b>4 (0.8)</b>  | <b>0</b>        | 55 (4.0)             | <b>28 (2.0)</b>  | <b>0</b>        |
| 15-<25%                         | <b>4 (0.8)</b>                     | 97 (18.7)       | <b>26 (5.0)</b> | <b>59 (4.3)</b>      | 395 (28.8)       | <b>75 (5.5)</b> |
| ≥25%                            | <b>0</b>                           | <b>46 (8.9)</b> | 333 (64.2)      | <b>0</b>             | <b>130 (9.5)</b> | 628 (45.8)      |

**(b) Fatal CVD**

| Conventional risk factors model | Addition of information on hs-cTnT |                  |                  |                      |                  |                  |
|---------------------------------|------------------------------------|------------------|------------------|----------------------|------------------|------------------|
|                                 | No. of cases (%)                   |                  |                  | No. of non-cases (%) |                  |                  |
|                                 | <15%                               | 15-<25%          | ≥25%             | <15%                 | 15-<25%          | ≥25%             |
| <15%                            | 143 (20.6)                         | <b>73 (10.5)</b> | <b>11 (1.6)</b>  | 1526 (41.2)          | <b>303 (8.2)</b> | <b>28 (0.8)</b>  |
| 15-<25%                         | <b>63 (9.1)</b>                    | 164 (23.6)       | <b>84 (12.1)</b> | <b>512 (13.8)</b>    | 624 (16.9)       | <b>275 (7.4)</b> |
| ≥25%                            | <b>3 (0.4)</b>                     | <b>27 (3.9)</b>  | 126 (18.2)       | <b>23 (0.6)</b>      | <b>132 (3.6)</b> | 280 (7.6)        |

Numbers in **green** indicate reclassification in the desired direction (up for cases, down for non-cases). Numbers in **red** indicate reclassification in the undesired direction (down for cases, up for non-cases). The conventional risk factors model included information on age, sex, centre, smoking status, history of diabetes mellitus, systolic blood pressure, and levels of total cholesterol and high-density lipoprotein cholesterol, and was stratified by treatment arm. Information on hs-cTnT was entered in categories as specified in [Figure 1](#).



## SUPPLEMENTAL FIGURES

---

**Online Figure 1 STROBE diagram**

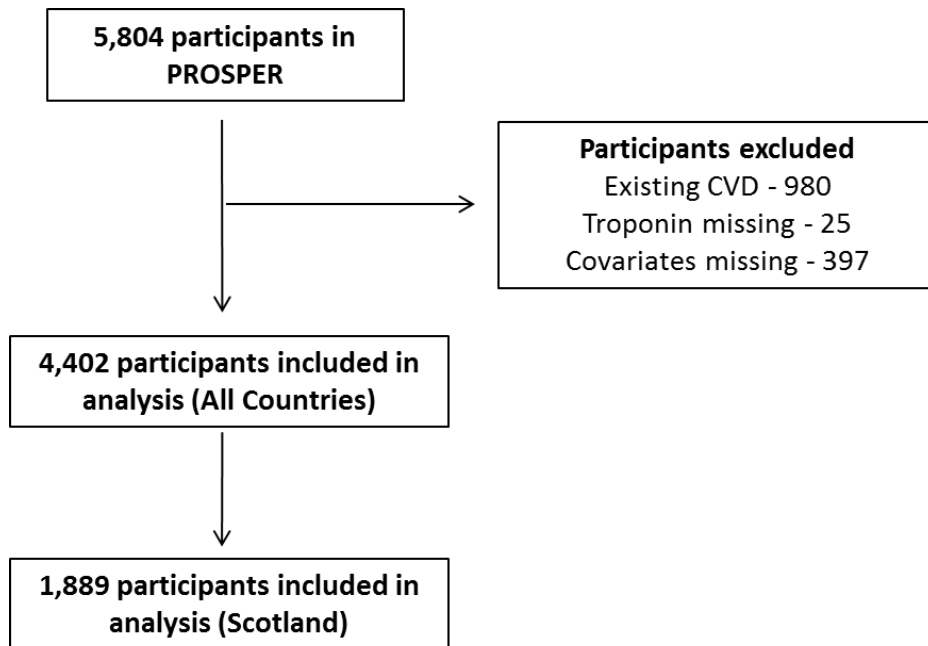

**Online Figure 2 Subgroup analysis of associations of hs-cTnT concentration with CVD and fatal CVD in the PROSPER study**

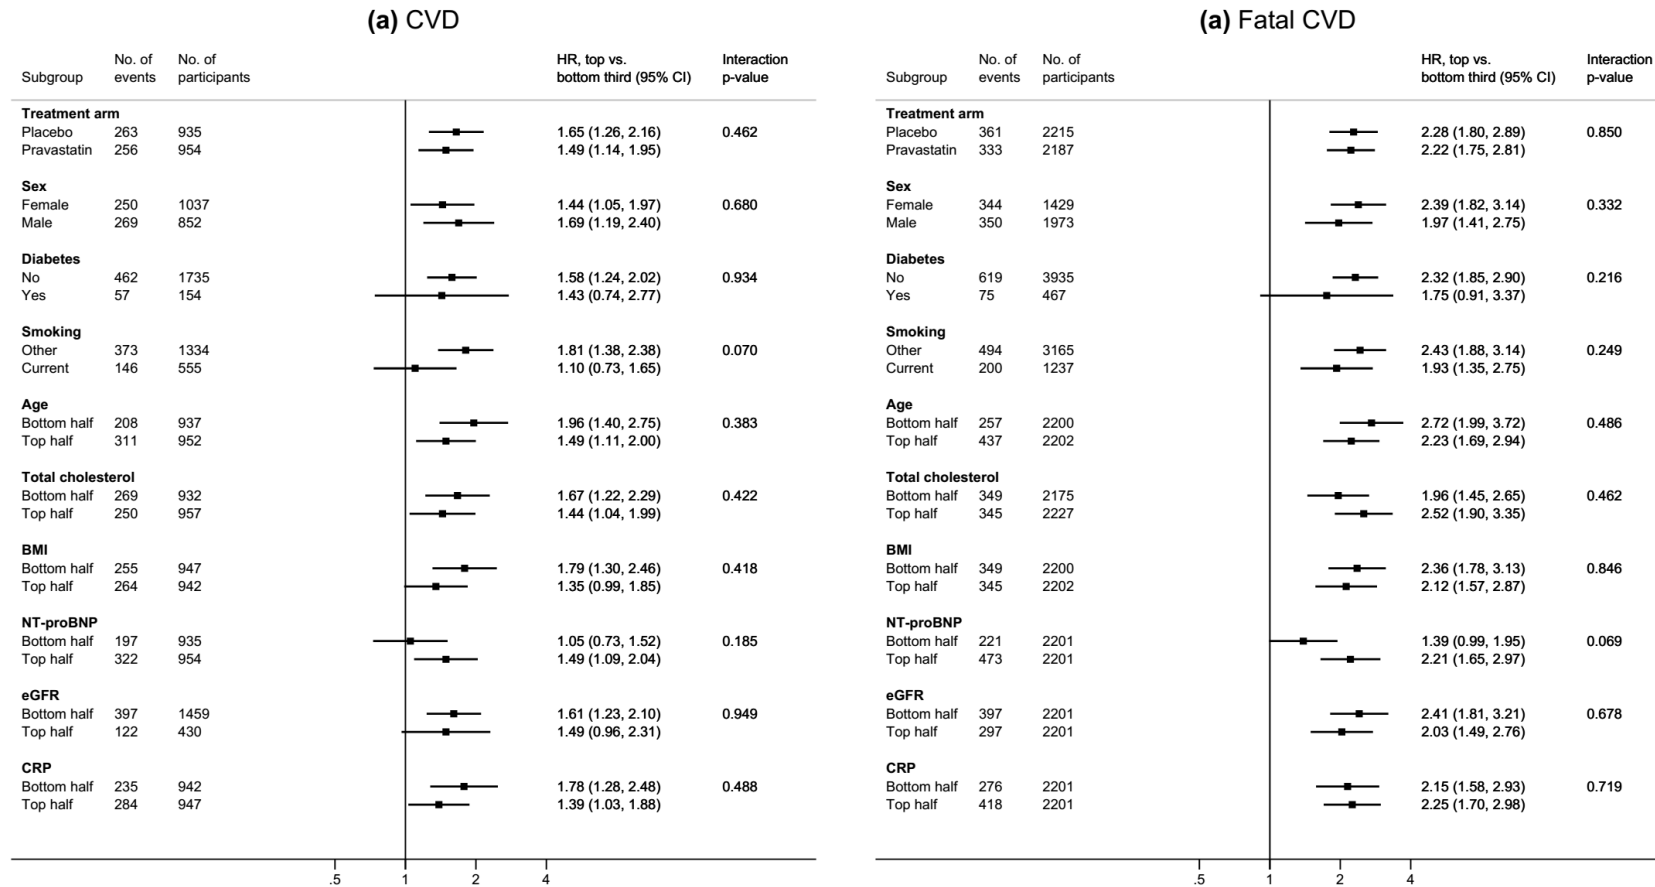

The models were adjusted for age, sex, centre, smoking status, history of diabetes mellitus, history of hypertension, systolic blood pressure, total cholesterol, high-density lipoprotein cholesterol, and body mass index, and stratified by treatment arm. Abbreviations: BMI=body mass index, CRP=C-reactive protein, eGFR=estimated glomerular filtration rate, HR=hazard ratio, NT-proBNP=N-terminal pro B-type natriuretic peptide.

**Online Figure 3** Flow diagram of the systematic literature review

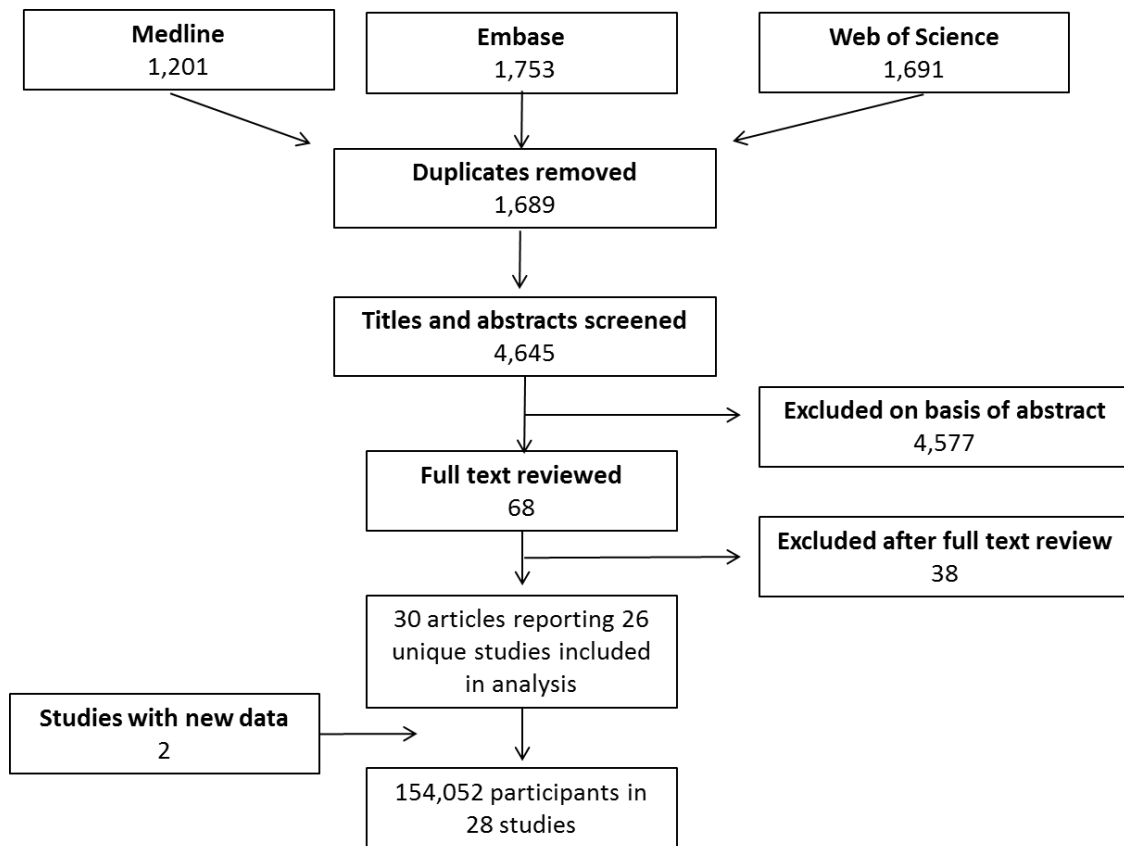

**Online Figure 4** Relative risks for cardiovascular disease in individuals in the top compared to the bottom third of cardiac troponin concentration

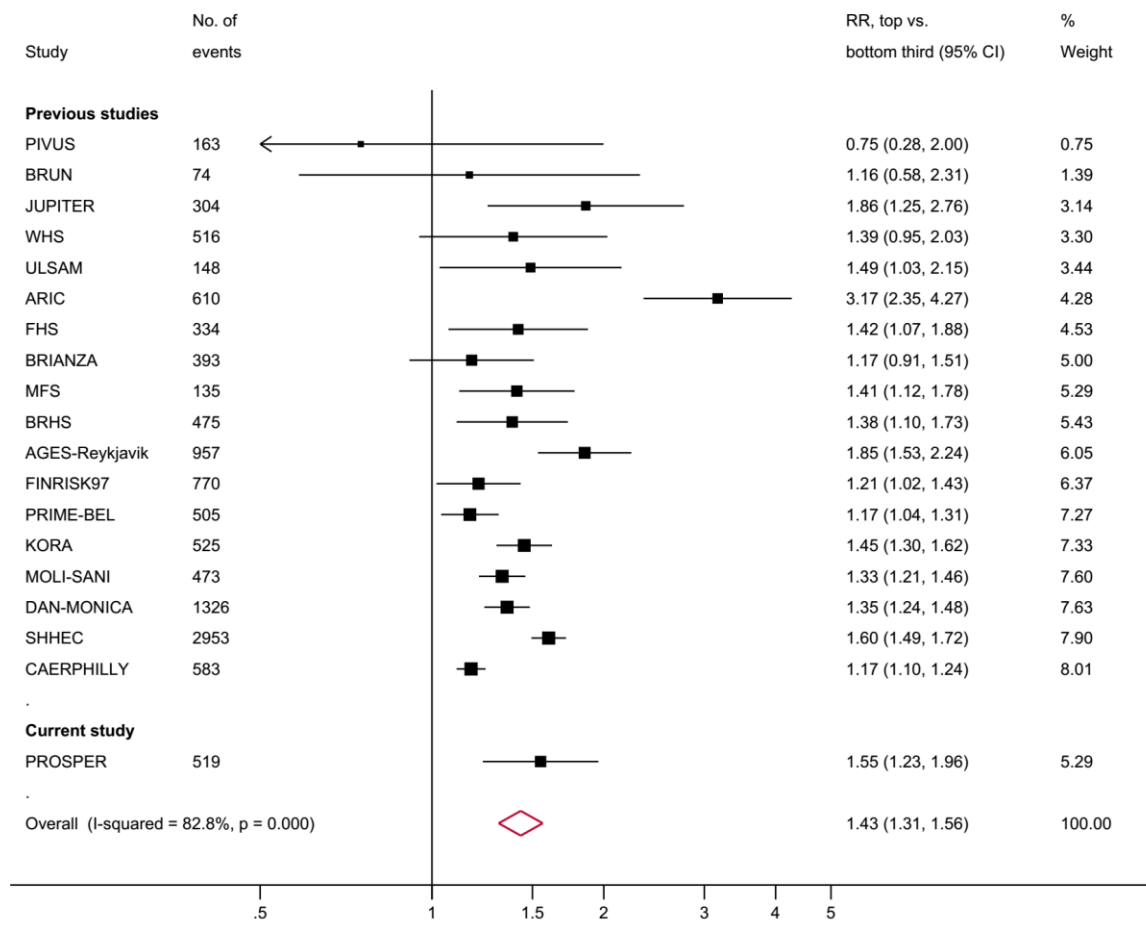

Sizes of data markers indicate the weight of each study in the analysis. For full study names, see footnote to [Table 1](#).

**Online Figure 5** Relative risks for coronary heart disease in individuals in the top compared to the bottom third of cardiac troponin concentration

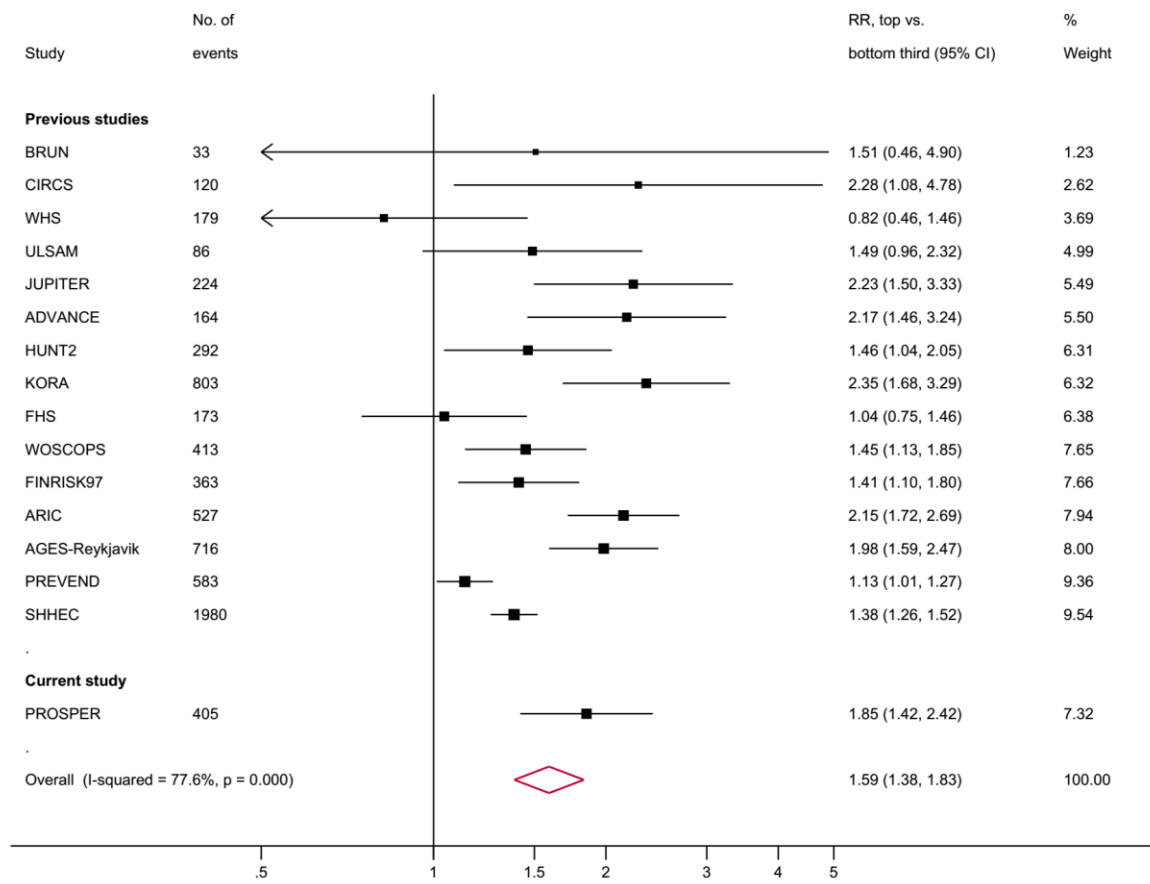

Sizes of data markers indicate the weight of each study in the analysis. For full study names, see footnote to [Table 1](#).

**Online Figure 6** Relative risks for stroke in individuals in the top compared to the bottom third of cardiac troponin concentration

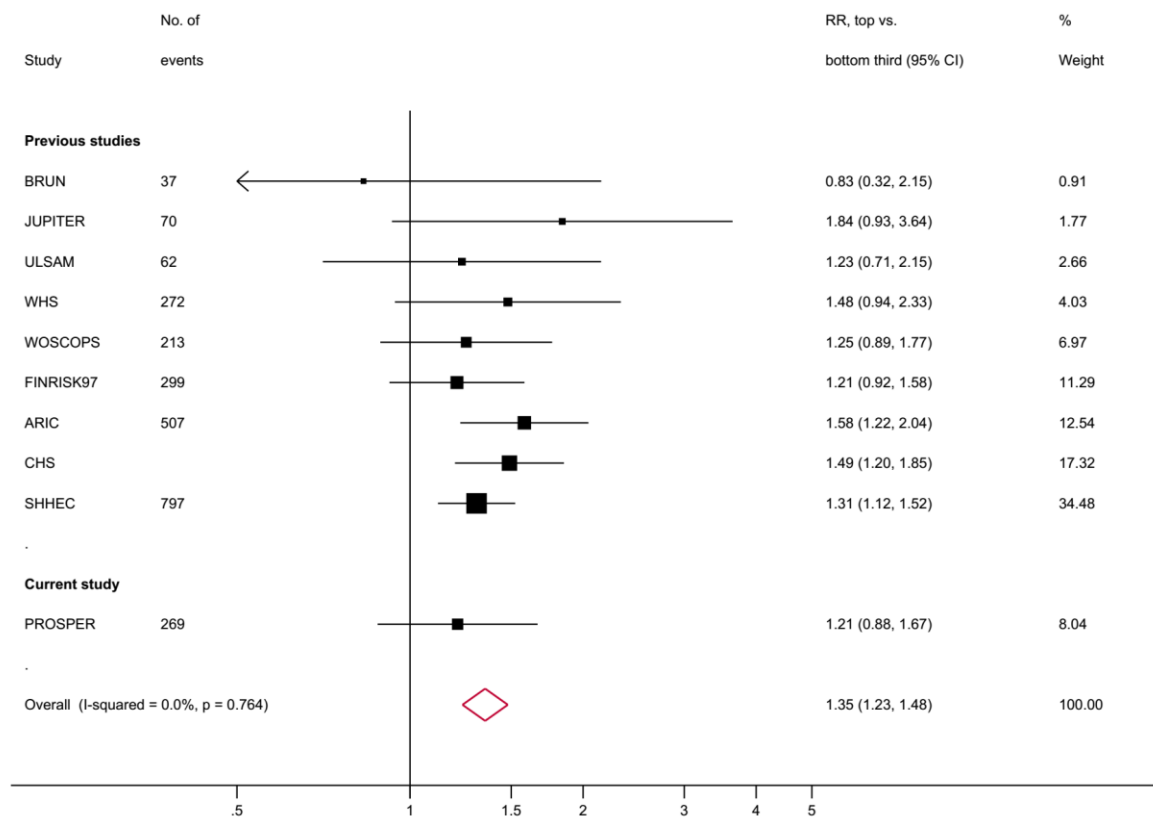

Sizes of data markers indicate the weight of each study in the analysis. For full study names, see footnote to [Table 1](#).

**Online Figure 7** Relative risks for fatal cardiovascular disease in individuals in the top compared to the bottom third of cardiac troponin concentration

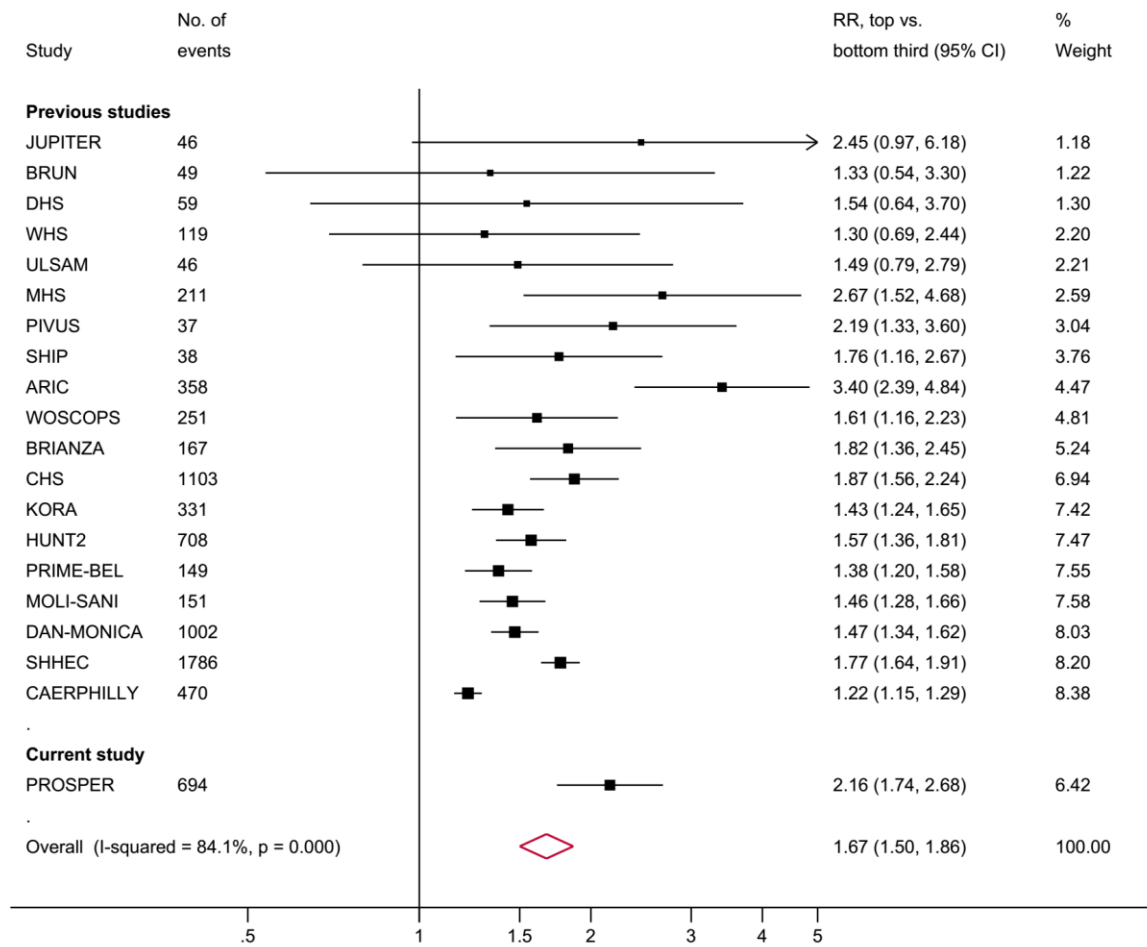

Sizes of data markers indicate the weight of each study in the analysis. For full study names, see footnote to [Table 1](#).

**Online Figure 8** Relative risks for cardiovascular outcomes in individuals in the top vs bottom third of cardiac troponin concentration according to categories of study-level characteristics

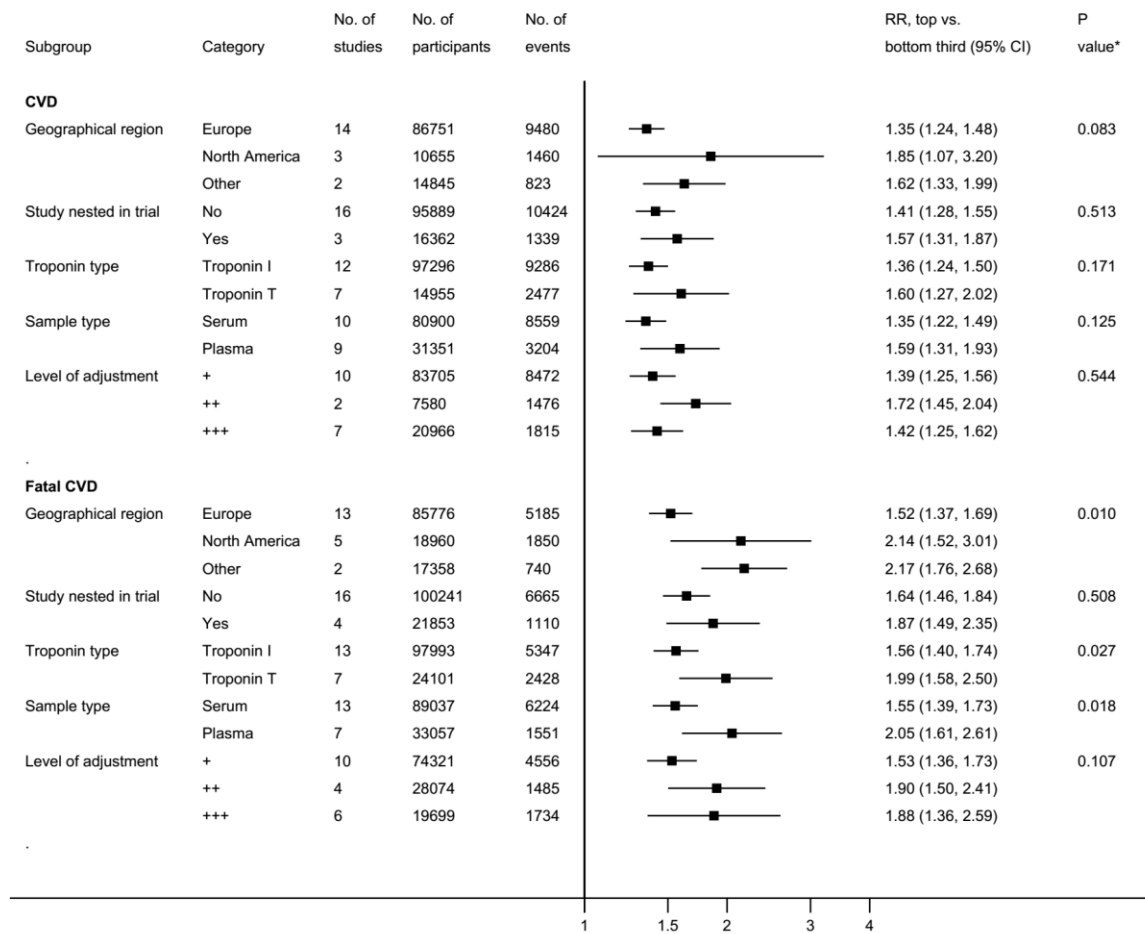

\*P values were calculated from meta-regression. Level of adjustment: +, adjusted for age and sex; ++, adjusted for age, sex, and smoking status; +++, adjusted for age, sex, smoking status, and other established CHD risk factors.



**Online Figure 9** Relative risks for cardiovascular outcomes in individuals in the top vs bottom third of cardiac troponin concentration according to continuous study-level characteristics

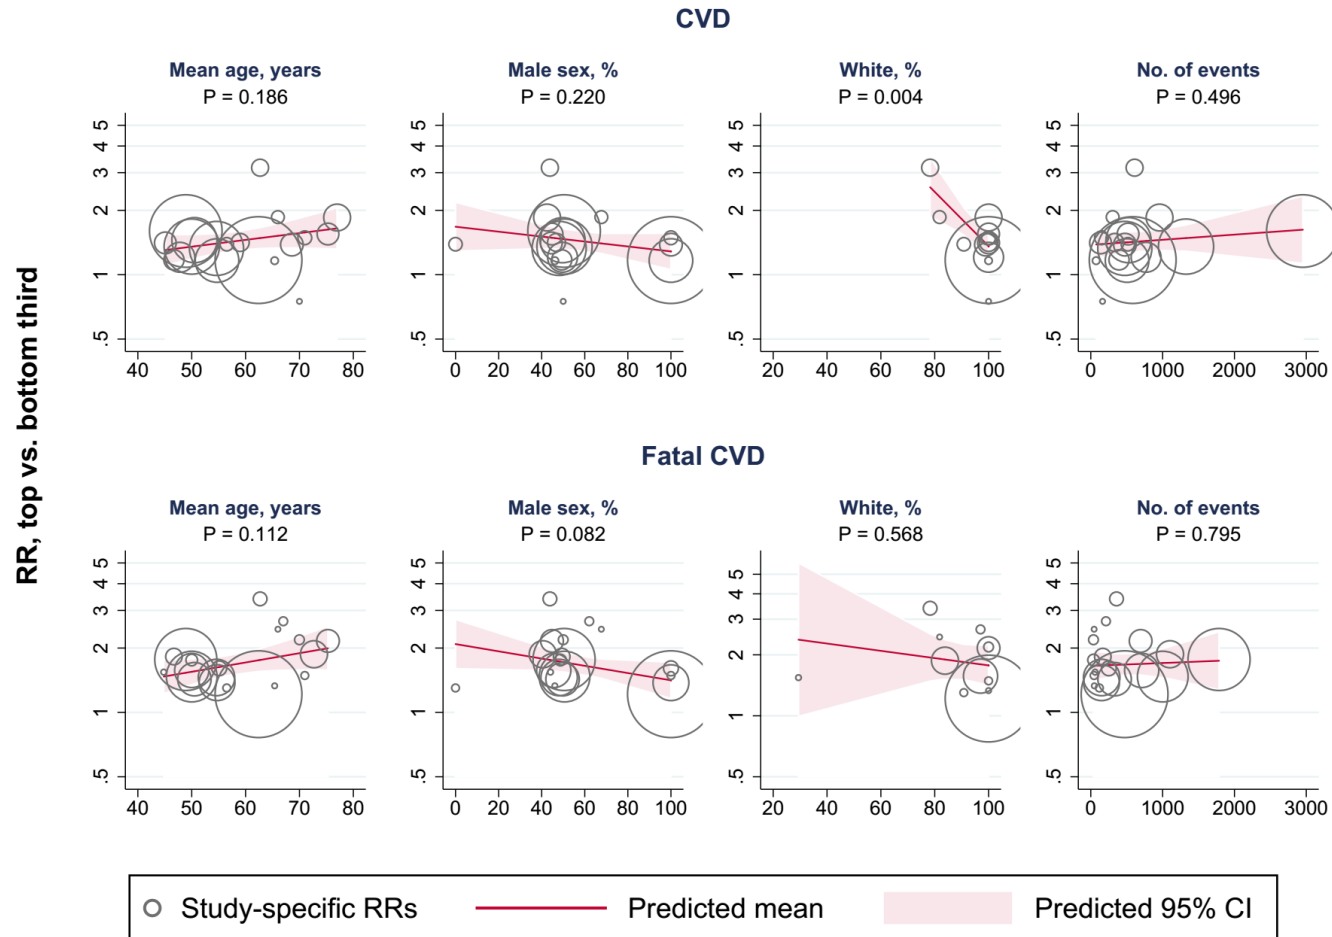

Each circle represents one study; the size of the circle is proportional to the inverse variance of the study-specific relative risk. P values were calculated from meta-regression.

**Online Figure 10** Funnel plots showing reported associations of cardiac troponin concentration with risk of cardiovascular outcomes

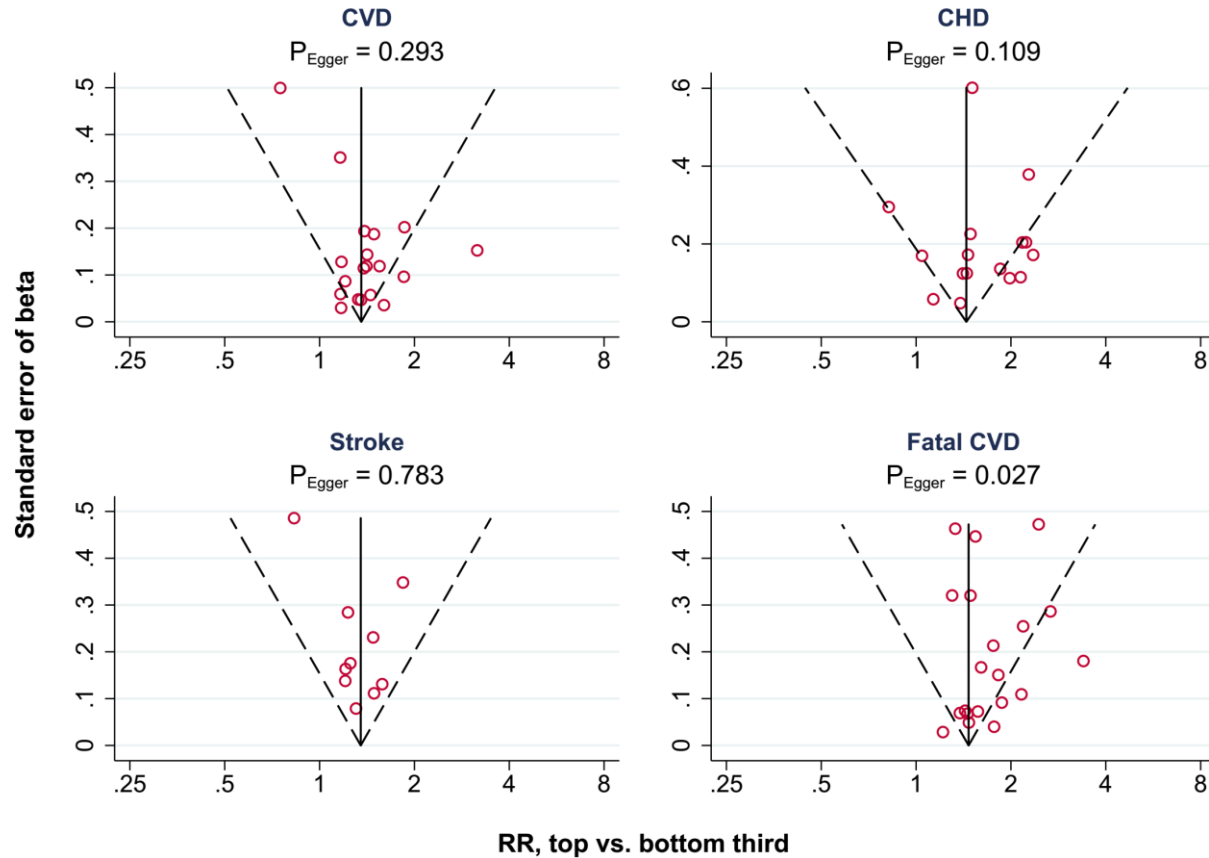

Funnel plots show study-specific relative risks plotted against their standard error. Each circle represents one study. In the absence of publication bias, studies lie within the symmetric funnel, with studies with high precision lying near the average effect and those with low precision spread evenly on both sides of the average effect. Visual deviation can indicate publication bias. P values from the Egger-test test for presence of publication bias. CHD=coronary heart disease, CVD=cardiovascular disease, RR=relative risk.
